# Supplementary material for: Cognitive Functions in Children and Adults with Moyamoya Vasculopathy: A Systematic Review and Meta-Analysis
Source: PubMed Central journal article supplement — J Stroke. 2018 Sep 30;20(3):332–41. doi: 10.5853/jos.2018.01550 (PMC6186911; doi:10.5853/jos.2018.01550), 2018-09-30
Supplement: jos-2018-01550-suppl.pdf [file jos-2018-01550-suppl.pdf]

**Supplementary for Syntax**

**OVID Medline (PubMed) syntax**

(moyamoya OR moya OR moya-moya [Title/Abstract]) AND (cognition OR neurocognitive OR intelligence OR psycho OR executive OR cognitive OR mental OR retardation OR memory OR language OR dementia [Title/Abstract])

**Embase syntax**

(moyamoya:ab,ti OR moya:ab,ti OR moya moya:ab,ti) AND (cognition:ab,ti OR neurocognitive:ab,ti OR intelligence:ab,ti OR psycho:ab,ti OR executive:ab,ti OR cognitive:ab,ti OR mental:ab,ti OR retardation:ab,ti OR memory:ab,ti OR language:ab,ti OR dementia:ab,ti)

**Supplementary for the Risk Assessment****Newcastle–Ottawa Scale adapted<sup>†</sup> for cross-sectional studies****Selection: (Maximum 4 stars)**

- 1) Representativeness of the sample<sup>‡</sup>
  - a) Truly representative of the average in the target population\*
  - b) Somewhat representative of the average in the target population\*
  - c) No description of the derivation of the cohort
- 2) Sample size<sup>§</sup>
  - a) Justified and satisfactory\*
  - b) Not justified
- 3) Selection criteria
  - a) Selection criteria were clearly described and consecutive patients were included\*
  - b) Selection criteria were not clearly described and it was unclear whether consecutive patients were included
- 4) Ascertainment of the exposure<sup>||</sup>
  - a) Validated measurement tool\*
  - b) Non-validated diagnostic measures (but the tool is available or described), or not all patients were DSA proven\*
  - c) No description of the diagnostic tool

**Outcome: (Maximum 3 stars)**

- 1) Assessment of the outcome (description of cognitive tests applied)<sup>‡</sup>
  - a) Extensive neuropsychological evaluation\*\*
  - b) IQ\*
  - c) Screening test\*
  - d) No description
- 2) Quantitative data:
  - a) The study reported cognitive or intellectual functioning in children and adults that allowed analysis of quantitative data.\*
  - b) The study did not report cognitive or intellectual functioning in children and adults that allowed analysis of quantitative data.

DSA, digital subtraction angiography; IQ, intelligence quotient.

The asterisk refers to the the number of stars (\* or \*\*) that can be assigned. It's a scoring method but not an actual footnote; <sup>†</sup>This scale has been adapted by the authors from the Newcastle–Ottawa Quality Assessment Scale for cohort studies<sup>1</sup> and the scale developed by Herzog et al. (2013)<sup>2</sup> to perform a quality assessment of cross-sectional studies for the systematic review: 'Cognitive functions in children and adults with moyamoya vasculopathy: a systematic review and meta-analysis.' Since there were no groups to compare (only patients with moyamoya (no control groups) were reviewed for this systematic review), we could not include the section 'Comparability'; <sup>‡</sup>Patients with moyamoya disease or syndrome: 1 star; <sup>§</sup>Sample size of n≥30: 1 star; <sup>||</sup> DSA or magnetic resonance angiography: 1 star; <sup>\*</sup>Neuropsychological test battery applied: 2 stars, IQ or screeningtest: 1 star.

**Supplementary Table 1.** Applied cognitive instruments/tests for each study

| Study                                  | Applied instruments/tests*                                                                                                                                                                                                                                                                                                                                                                                                                         |
|----------------------------------------|----------------------------------------------------------------------------------------------------------------------------------------------------------------------------------------------------------------------------------------------------------------------------------------------------------------------------------------------------------------------------------------------------------------------------------------------------|
| Hsu et al. (2014) <sup>3†</sup>        | WISC-III or WISC-IV; WAIS-III<br>POI: Perceptual Organization Index<br>WMI: Working Memory Index<br>PSI: Processing Speed Index<br>WL1: Immediate Recall of the Word List<br>WL2: Delayed Recall of the Word List<br>WL-recog: Recognition of the Word List<br>CFT: Category Fluency Test<br>JLO: Judgment of Line Orientation                                                                                                                     |
| Williams et al. (2012) <sup>4†</sup>   | WISC-III or WISC-IV; WAIS-III; WPPSI-III<br>VCI: Verbal Comprehension Index<br>PRI: Perceptual Reasoning Index<br>WMI<br>PSI                                                                                                                                                                                                                                                                                                                       |
| Lee et al. (2011) <sup>5†</sup>        | KEDI-WISC-R<br>BGT recall: Bender Gestalt Test                                                                                                                                                                                                                                                                                                                                                                                                     |
| Imaizumi et al. (1999) <sup>6†</sup>   | WPPSI; WISC-R; WAIS-R; Tanaka-Bonet Intelligence Test<br>Tumori-Inage Mental Development Test                                                                                                                                                                                                                                                                                                                                                      |
| Ohtaki et al. (1998) <sup>7†</sup>     | WAIS-R; WISC-R                                                                                                                                                                                                                                                                                                                                                                                                                                     |
| Matsushima et al. (1997) <sup>8†</sup> | WISC                                                                                                                                                                                                                                                                                                                                                                                                                                               |
| Matsushima et al. (1991) <sup>9†</sup> | WISC; development questionnaires of Tsumori et al.                                                                                                                                                                                                                                                                                                                                                                                                 |
| Sato et al. (1990) <sup>10†</sup>      | WISC-R; WIPPSI; Developmental test<br>BGT                                                                                                                                                                                                                                                                                                                                                                                                          |
| Tagawa et al. (1989) <sup>11†</sup>    | WISC                                                                                                                                                                                                                                                                                                                                                                                                                                               |
| Ibayashi et al. (1985) <sup>12†</sup>  | WAIS; Benton's Visual Memory Test                                                                                                                                                                                                                                                                                                                                                                                                                  |
| Ishii et al. (1984) <sup>13†</sup>     | WISC; WAIS                                                                                                                                                                                                                                                                                                                                                                                                                                         |
| Lei et al. (2017) <sup>14†</sup>       | TMT-B (s): Time consumed in the Trail Making Test part B<br>MES-EX: executive subtests of Memory and Executive Screening                                                                                                                                                                                                                                                                                                                           |
| Kazumata et al. (2015) <sup>15†</sup>  | WAIS-III<br>WSCT: Wisconsin Sorting Test<br>TMT-A/B: Trail Making Test part A and B<br>CPT: Continuous Performance Test<br>Stroop test<br>RST: Reading Span Test                                                                                                                                                                                                                                                                                   |
| Su et al. (2013) <sup>16†</sup>        | MoCA: Montreal Cognitive Assessment                                                                                                                                                                                                                                                                                                                                                                                                                |
| Calviere et al. (2012) <sup>17†</sup>  | Letter R<br>Category (animals) fluency test<br>TMT-A/B<br>Stroop interference condition<br>Brixton test<br>WCST-C/-P: Wisconsin Card Sorting Test number of categories and number of perseverations<br>Colored dots and word sections of the Stroop test<br>Verbal fluency tests<br>Naming and Recognition Test of 80 common objects<br>Rey figure copy test<br>Hooper test<br>Immediate and delayed 16 free and cued recalls<br>Rey figure recall |

**Supplementary Table 1.** Continued

| Study                                 | Applied instruments/tests*                                                                                                                                                                                                                                                                                 |
|---------------------------------------|------------------------------------------------------------------------------------------------------------------------------------------------------------------------------------------------------------------------------------------------------------------------------------------------------------|
| Festa et al. (2010) <sup>18†</sup>    | WAIS-III; WASI<br>Hopkins Verbal Learning Test<br>California Verbal Learning Test<br>TMT-A/B<br>Boston Naming Test<br>Animal Fluency<br>COWAT: Controlled Oral Word Association Test<br>WCST: Wisconsin Card Sorting Test<br>Grooved Pegboard Test<br>Hand Dynamometer                                     |
| Karzmark et al. (2008) <sup>19‡</sup> | WAIS-R; WAIS-III<br>California Verbal Learning Test-II<br>Memory Test-Revised Visual Reproduction subtest<br>Delis-Kaplan Executive Function System Design Fluency Test<br>FAS/AN: Letter and Category Fluency Tests<br>TMT-A/B<br>Grooved Pegboard<br>Tactile Form Recognition Test<br>Boston Naming Test |

This table represents the cognitive instruments/tests used in each study separately.

WISC (-R or -III or -IV), Wechsler Intelligence Scale (revised or third or fourth edition); WAIS (-R or -III), Wechsler Adult Intelligence Scale (revised or third edition); WPPSI (-III), Wechsler Preschool and Primary Scale of Intelligence (third edition); KEDI-WISC-R, Korean Educational Development Institute Wechsler Intelligence Scale for Children-Revised; WASI, Wechsler Abbreviated Intelligence Scale.

\*As reported by the authors; †Studies reporting results in children; ‡Studies reporting results in adults.

**Supplementary Table 2.** Predefined cognitive domains according to standard neuropsychological practice specified in Lezak<sup>20</sup>

| Cognitive domain              | Included test                                                   |
|-------------------------------|-----------------------------------------------------------------|
| General intelligence          |                                                                 |
| Crystallised intelligence     | Verbal IQ                                                       |
|                               | Similarities (WAIS)                                             |
|                               | Vocabulary (WAIS)                                               |
|                               | Information (WAIS)                                              |
|                               | Comprehension (WAIS)                                            |
|                               | National Adult Reading Test                                     |
|                               | Synonyms                                                        |
| Fluid intelligence            | Performal IQ                                                    |
|                               | Raven Progressive Matrices                                      |
|                               | Picture Completion (WAIS)                                       |
|                               | Picture Arrangement (WAIS)                                      |
|                               | Arithmetic                                                      |
| Category Test                 |                                                                 |
| Memory                        |                                                                 |
| Working memory                | Digit Span Forward & Backward                                   |
|                               | Block Span Forward & Backward                                   |
|                               | Memory Scanning Test                                            |
|                               | Brown-Peterson task                                             |
| Learning & Immediate memory   | Logical Memory Immediate Recall                                 |
|                               | Visual Reproductions Immediate Recall                           |
|                               | Paired Associate Learning Immediate Recall (verbal & nonverbal) |
|                               | Serial Digit Learning                                           |
|                               | Word List Immediate Recall                                      |
|                               | (Buschke) Selective Reminding Test Immediate Recall             |
|                               | Visual Retention Test Immediate Recall                          |
|                               | Object Memory Immediate Recall                                  |
|                               | Rey Complex Figure Immediate Recall                             |
|                               | Auditory Verbal Learning Test Immediate Recall                  |
|                               | Serial Learning Test                                            |
|                               | Word/Picture Recognition Immediate Recall                       |
|                               | Spatial Memory Test                                             |
|                               | California Verbal Learning Test Immediate Recall                |
|                               | Claeson-Dahl Test Immediate Recall                              |
|                               | Seashore Tonal Memory Test                                      |
|                               | Figural Memory Immediate Recall                                 |
|                               | Iconic Memory                                                   |
|                               | Maze Learning Immediate Recall                                  |
|                               | Tactual Performance Test Immediate                              |
| Prose Recall Immediate Recall |                                                                 |
| Symbol-Digit Learning Test    |                                                                 |

**Supplementary Table 2.** Continued

| Cognitive domain            | Included test                                                 |
|-----------------------------|---------------------------------------------------------------|
| Learning & Immediate memory | Babcock paragraph Immediate Recall                            |
|                             | East Boston Memory Test Immediate Recall                      |
| Delayed memory              | Logical Memory Delayed Recall                                 |
|                             | Visual Reproductions Delayed Recall                           |
|                             | Word List Delayed Recall                                      |
|                             | (Buschke) Selective Reminding Test Delayed Recall             |
|                             | Visual Retention Test Delayed Recall                          |
|                             | Object Memory Delayed Recall                                  |
| Cognitive domain            | Included test                                                 |
|                             | Rey Complex Figure Delayed Recall                             |
|                             | Auditory Verbal Learning Test Delayed Recall                  |
|                             | Paired Associate Learning Delayed Recall (verbal & nonverbal) |
|                             | Word/Picture recognition delayed                              |
|                             | California Verbal Learning Test Delayed Recall                |
|                             | Claeson-Dahl Test Delayed Recall                              |
|                             | Figural memory Delayed                                        |
|                             | Maze Learning Delayed                                         |
|                             | Tactual Performance Test Delayed Recall                       |
|                             | Delayed serial visual/verbal form memory task                 |
|                             | Prose Recall Delayed                                          |
|                             | Babcock paragraph Delayed                                     |
|                             | East Boston Memory Test Delayed Recall                        |
|                             | Logical Memory Delayed Recall                                 |
|                             | Visual Reproductions Delayed Recall                           |
|                             | Word List Delayed Recall                                      |
|                             | (Buschke) Selective Reminding Test Delayed Recall             |
|                             | Visual Retention Test Delayed Recall                          |
|                             | Object Memory Delayed Recall                                  |
|                             | Included test                                                 |
|                             | Rey Complex Figure Delayed Recall                             |
|                             | Auditory Verbal Learning Test Delayed Recall                  |
|                             | Paired Associate Learning Delayed Recall (verbal & nonverbal) |
|                             | Word/Picture recognition delayed                              |
|                             | California Verbal Learning Test Delayed Recall                |
|                             | Claeson-Dahl Test Delayed Recall                              |
|                             | Figural memory Delayed                                        |
|                             | Maze Learning Delayed                                         |
|                             | Tactual Performance Test Delayed Recall                       |
|                             | Delayed serial visual/verbal form memory task                 |
|                             | Prose Recall Delayed                                          |
|                             | Babcock paragraph Delayed                                     |
|                             | East Boston Memory Test Delayed Recall                        |

**Supplementary Table 2.** Continued

| Cognitive domain                     | Included test                            |
|--------------------------------------|------------------------------------------|
| Processing speed                     |                                          |
| Psychomotor efficiency               | Digit Symbol Substitution                |
|                                      | Symbol Digit Modalities Test             |
|                                      | Trailmaking Test A                       |
|                                      | Grooved Pegboard                         |
|                                      | Purdue Pegboard                          |
|                                      | Graded Reaction Time Task                |
|                                      | Perceptual Speed                         |
| Motor speed                          | Simple reaction time                     |
|                                      | Fingertapping Test                       |
|                                      | Finger Oscillation Test                  |
| <b>Attention</b>                     |                                          |
| Visual attention                     | Stroop Color Word Test Part I & II       |
|                                      | Facial Recognition Test                  |
|                                      | Target finding task                      |
| Sustained attention                  | Digit Vigilance Test                     |
|                                      | Quatember & Maly's Vigilance Test        |
| Divided attention                    | PASAT                                    |
| Selective attention                  | Stroop Color Word Test Part III          |
| Cognitive domain                     | Included test                            |
| Cognitive flexibility                | Lexical Fluency Task                     |
|                                      | Category Fluency Task                    |
|                                      | Trailmaking Test B (also C, D and Color) |
|                                      | Category Test                            |
|                                      | Concept Shifting Task                    |
|                                      | Wisconsin Card Sorting Task              |
|                                      | Serial subtraction (3s of 7s)            |
|                                      | Card Sorting                             |
|                                      |                                          |
| <b>Perception &amp; Construction</b> |                                          |
| Perception & Construction            | Visual Retention Test Copy               |
|                                      | Visual Reproductions Copy                |
|                                      | Block Design                             |
|                                      | Clock Drawing                            |
|                                      | Rey Complex Figure Copy                  |
|                                      | Tactual Performance Test Part I          |
|                                      | Object Assembly (WAIS)                   |
|                                      | Embedded Figures                         |
|                                      | De Renzi Rods                            |
|                                      | Flicker Fusion                           |
|                                      | Perception of spaced stimuli             |
|                                      | Time judgement                           |
|                                      | Visual Recognition Threshold             |
|                                      | Street Completion                        |
|                                      | Rosen figure drawing test                |

**Supplementary Table 2.** Continued

| Cognitive domain | Included test                                |
|------------------|----------------------------------------------|
| Language         | (Boston) Naming Test                         |
|                  | Token Test                                   |
|                  | Boston Diagnostic Aphasia Test Writing Scale |

IQ, intelligence quotient; WAIS, Wechsler Adult Intelligence Scale.

**Supplementary Table 3.** Characteristics of studies assessing cognitive functions in children and adults with moyamoya vasculopathy

| Study                                  | Mid-year | Design | Inclusion criteria                                           | Exclusion criteria                                                                                                                                        | No.              | Age (yr)                     | Female (%) | Ethnicity (%)                                    | Presenting symptoms (%)                                                      | Duration (mo)                    | MMV site (%)    | Site of stroke clinically (%) | Site of stroke imaging (%)                                           |
|----------------------------------------|----------|--------|--------------------------------------------------------------|-----------------------------------------------------------------------------------------------------------------------------------------------------------|------------------|------------------------------|------------|--------------------------------------------------|------------------------------------------------------------------------------|----------------------------------|-----------------|-------------------------------|----------------------------------------------------------------------|
| Hsu et al. (2014) <sup>3*</sup>        | 2010     | -      | Pediatric MMD >6 yr old; TIA as initial symptom              | Cortical hemorrhage; prior revascularization; uncooperation; underlying systemic diseases                                                                 | 13               | 13.9±6.3 (6–17) <sup>†</sup> | -          | Chinese                                          | TIA 100                                                                      | 17±15.9 (1–48) <sup>†</sup>      | -               | -                             | -                                                                    |
| Williams et al. (2012) <sup>4*</sup>   | 2004     | Retro  | MMD or MMS; <18 yr; NPA pre-surgery; English language skills | Whole brain radiation; severe developmental delay associated with genetic comorbidities; revascularization surgery; lack of parent/child agreement to NPA | 30               | 10.1±4 <sup>†</sup>          | 60         | Caucasian 40<br>Asian 27<br>Black 20<br>Other 13 | Infarction 50                                                                | 35.0±49 (2–204) <sup>†</sup>     | Bi 47<br>Uni 53 | Bi 10<br>Uni 40               | No stroke 30<br>Stroke 70<br>Bi 33<br>Uni 67<br>Cortical 57<br>WM 43 |
| Lee et al. (2011) <sup>5*</sup>        | 2007     | -      | MMD with pre- and postoperative NPA                          | -                                                                                                                                                         | 65               | 9.1 (4–17) <sup>†</sup>      | 43         | Korean                                           | -                                                                            | -                                | Bi 82<br>Uni 18 | -                             | No stroke 60<br>Stroke 40<br>MS 15<br>BZ 25                          |
| Imazumi et al. (1999) <sup>6*</sup>    | 1984     | -      | MMD and IQ tested >once during course disease                | -                                                                                                                                                         | 38               | 6.5±3.3 (1–13) <sup>†</sup>  | 63         | Japanese                                         | Infarction 26<br>TIA 63<br>Other 11                                          | 16.2±16.1 (1–60) <sup>†</sup>    | -               | -                             | -                                                                    |
| Ohtaki et al. (1998) <sup>7*</sup>     | 1990     | Retro  | Omental transplantation frontal lobes                        | -                                                                                                                                                         | 8 <sup>§</sup>   | 7.1±2.0 (5–11) <sup>  </sup> | 75         | Japanese                                         | Minor completed stroke 12.5<br>Hemorrhage 12.5<br>TIA 75                     | 18.9±19.7 (2–60) <sup>  </sup>   | Bi 87<br>Uni 13 | Bi 25<br>Uni 75               | -                                                                    |
| Matsushima et al. (1997) <sup>8*</sup> | -        | Retro  | IQ >70; EDAS performed <9.5 yr                               | -                                                                                                                                                         | 20               | 9.6±3.4 <sup>  </sup>        | 40         | Japanese                                         | Infarction 30<br>TIA 70                                                      | -                                | -               | -                             | -                                                                    |
| Matsushima et al. (1991) <sup>9*</sup> | 1984     | -      | MMD                                                          | -                                                                                                                                                         | 50 <sup>†</sup>  | 9.4±4.3 (2–21) <sup>  </sup> | 56         | Japanese                                         | Movement disorder 80<br>Seizures 6<br>Headache 10<br>Involuntary movements 4 | 55.8±50.7 (0–188) <sup>  </sup>  | -               | -                             | -                                                                    |
| Sato et al. (1990) <sup>10*</sup>      | -        | -      | Revascularization and CBF evaluation                         | -                                                                                                                                                         | 12 <sup>**</sup> | 5.9±2.3 (1–10) <sup>†</sup>  | 33         | Japanese                                         | Ischemia 50<br>TIA 50                                                        | 12.6±10.6 (1–31) <sup>†</sup>    | Bi 92<br>Uni 8  | Bi 66<br>Uni 33               | No stroke 50<br>Stroke 50<br>Bi 50<br>Uni 50                         |
| Tagawa et al. (1989) <sup>11*</sup>    | -        | -      | Children with MMD                                            | -                                                                                                                                                         | 10 <sup>††</sup> | 10.2±3.2 (6–15) <sup>†</sup> | 60         | Japanese                                         | Infarction 10<br>TIA 90                                                      | 57.8±50.5 (13–155) <sup>†</sup>  | -               | -                             | -                                                                    |
| Ibayashi et al. (1985) <sup>12*</sup>  | -        | -      | Juvenile MMD patients                                        | -                                                                                                                                                         | 15               | 9.2±3.3 (5–16) <sup>††</sup> | 53         | Japanese                                         | Completed stroke 53<br>TIA 47                                                | 48.3±44.3 (19–136) <sup>††</sup> | -               | -                             | -                                                                    |
| Ishii et al. (1984) <sup>13*</sup>     | -        | -      | -                                                            | -                                                                                                                                                         | 20               | 9.9±3.1 (5–16) <sup>††</sup> | 50         | Japanese                                         | Completed stroke 60<br>TIA 40                                                | -                                | -               | -                             | -                                                                    |

Supplementary Table 3. Continued

| Study                                  | Mid-year | Design         | Inclusion criteria                                                                                           | Exclusion criteria                                                                                                                                                                        | No. | Age (yr)                         | Female (%) | Ethnicity (%)                                               | Presenting symptoms (%)                                 | Duration (mo)       | MMV site (%)    | Site of stroke clinically (%) | Site of stroke imaging (%)                                                             |
|----------------------------------------|----------|----------------|--------------------------------------------------------------------------------------------------------------|-------------------------------------------------------------------------------------------------------------------------------------------------------------------------------------------|-----|----------------------------------|------------|-------------------------------------------------------------|---------------------------------------------------------|---------------------|-----------------|-------------------------------|----------------------------------------------------------------------------------------|
| Lei et al. (2017) <sup>148S</sup>      | 2013     | Pro            | 18–80 yr; rhanded; MMD on DSA; no abnormalities/ICH several brain locations; no surgery; physically able NPA | Significant neurological diseases; psychiatric disorders; other cerebrovascular diseases; systemic diseases; specific medication                                                          | 26  | 40.2±9.4**                       | 54         | Chinese                                                     | Minor stroke 27<br>TIA 54<br>Headache 19                | -                   | -               | -                             | No hyperintense signals >8 mm in maximum dimension                                     |
| Kazumata et al. (2015) <sup>158S</sup> | 2013     | Pro            | >20 yr; idiopathic MMD                                                                                       | Quasi MMD; cortical infarction/subcortical lesion >8 mm; intracranial hemorrhage; revascularization surgery; neurological deficit because of stroke; comorbid illness affecting cognition | 23  | 40.9±9.5 (21–58)**               | 74         | Japanese                                                    | TIA 43<br>Asymptomatic 57                               | -                   | Bi 100          | -                             | No stroke 57<br>Stroke 43<br>Bi 50<br>Uni 50                                           |
| Su et al. (2013) <sup>168S</sup>       | 2008     | Pro            | MMD with IVH; 18–60 yr; no revascularization surgery; BI >60/mRS <4; no mental disability                    | Other cerebrovascular diseases; AED; recurrent stroke during FU                                                                                                                           | 26  | 43.7±8.6 (26–59)**               | 46         | Chinese                                                     | Hemorrhage 100                                          | 1.2 <sup>†</sup>    | -               | -                             | IVH 100                                                                                |
| Calviere et al. (2012) <sup>178S</sup> | 2002     | Pro            | MMD; >3 mo after stroke; no revascularization surgery                                                        | <18 yr; any associated disease potentially responsible for the arterial lesions                                                                                                           | 13  | 36.6±12.9**                      | 64         | Caucasian 86<br>Other 12                                    | Ischemic stroke 62<br>Hemorrhage 8<br>Other 30          | 36.1 <sup>   </sup> | Bi 64<br>Uni 36 | Bi 12<br>Uni 88               | No stroke 29<br>Stroke 71<br>Bi 60<br>Uni 40<br>Cortical 70<br>SC 60<br>BZ 90<br>WMT10 |
| Festa et al. (2010) <sup>188S</sup>    | 2002     | Pro- and retro | MMD with complete NPA                                                                                        | (neurological) Disorders affecting cognition                                                                                                                                              | 29  | 39.9±11.2 (20–65) <sup>   </sup> | 62         | Caucasian 59<br>Hispanic 20<br>Afro-american 20<br>Asian 21 | Ischemic stroke 72<br>TIA 17<br>Hemorrhage 3<br>Other 8 | -                   | Bi 86<br>Uni 14 | -                             | No stroke 17<br>Stroke 83<br>Bi 75<br>Uni 25                                           |
| Karzmark et al. (2008) <sup>98S</sup>  | 2005     | -              | MMD                                                                                                          | -                                                                                                                                                                                         | 36  | 36.6±9.9 <sup>†</sup>            | 67         | Caucasian 75<br>Asian 17<br>Other 8                         | -                                                       | -                   | -               | -                             | -                                                                                      |

Values are presented as mean±standard deviation (range), mean±standard deviation, or mean (range). This table represents the study and patients' characteristics separated for children and adults. MMV, moyamoya vasculopathy; MMD, moyamoya disease; TIA, transient ischemic attack; Retro, retrospective; MMS, moyamoya syndrome; NPA, neuropsychological assessment; Bi, bilateral; Uni, unilateral; WM, white matter; MS, major stroke; BZ, borderzone; IQ, intelligence quotient; EDAS, encephaloduroarterioangiomas; CBF, cerebral blood flow; Pro, prospective; DSA, digital subtraction angiography; ICH, intracerebral hemorrhage; IVH, intraventricular hemorrhage; BI, Barthel Index; mRS, modified Rankin Score; AED, anti-epileptic drug; FU, follow-up; SC, subcortical; R, right. \*Studies reporting results in children; <sup>†</sup>At NPA; <sup>‡</sup>At diagnosis; <sup>§</sup>Excluding 2 patients (1 scaled out, 1 not investigated); <sup>||</sup>At operation; <sup>|||</sup>Study included 65 patients with preoperative data in 50 patients; <sup>§§</sup>Study included 13 patients from which 12 had preoperative data; <sup>††</sup>Study included 21 patients from which 10 had preoperative data; <sup>†††</sup>Not specified; <sup>§§§</sup>Studies reporting results in adults; <sup>|||</sup>At presentation.



Supplementary Table 4. Neuropsychological test performances

| Study                                  | Authors criteria cognitive impairment                                                    | Cognitive impairment overall (%) | Conclusion authors                                                | Cognition screener score | (FS) IQ score   | VIQ score                  | PIQ score                   | DQ score                   | Memory score       | Prospect score     | Attr/EF score    | Vspwr/const score | Language score | % Impaired |
|----------------------------------------|------------------------------------------------------------------------------------------|----------------------------------|-------------------------------------------------------------------|--------------------------|-----------------|----------------------------|-----------------------------|----------------------------|--------------------|--------------------|------------------|-------------------|----------------|------------|
| Hsu et al. (2014) <sup>3*</sup>        | IQ: >80 normal 70-79 borderline <70 defective<br>NPA: <1.5 SD borderline <2 SD defective | 39                               | Normal intellectual development with specific impairments in some | -                        | 102±13 (82-124) | 99±15 (77-117)             | 103±13 (81-123)             | 0                          | 86±28 (z=-0.99)    | 103.2±179 (z=0.00) | 13.3±47 (z=0.50) | 21.8±43 (z=-0.53) | -              | 8          |
| Williams et al. (2012) <sup>4*</sup>   | 1 SD from the mean (IQ, 85-110)                                                          | -                                | Significant lower than test sample                                | -                        | 87±18           | 91±14                      | 89±22                       | -                          | 87.3±158 (z=-0.95) | 87.2±132           | -                | -                 | -              | -          |
| Lee et al. (2011) <sup>5*</sup>        | Compared with population averages                                                        | -                                | Age appropriate IQ                                                | -                        | 107±14          | 108±13                     | 105±16                      | -                          | 3.8±19 (z=0.45)    | -                  | -                | -                 | -              | -          |
| Imaizumi et al. (1999) <sup>6*</sup>   | -                                                                                        | -                                | -                                                                 | -                        | 93±23           | -                          | -                           | -                          | -                  | -                  | -                | -                 | -              | -          |
| Ohtaki et al. (1998) <sup>7*</sup>     | IQ: >80 normal 89-70 borderline <68 retardation                                          | 13                               | Normal intellectual range                                         | -                        | 103±20 (58-128) | -                          | -                           | -                          | -                  | -                  | -                | -                 | -              | -          |
| Matsushina et al. (1997) <sup>8*</sup> | Normal IQ >86                                                                            | 15                               | -                                                                 | -                        | 107±18          | 105±21                     | 109±13                      | -                          | -                  | -                  | -                | -                 | -              | -          |
| Matsushina et al. (1991) <sup>9*</sup> | Normal IQ >86                                                                            | 50                               | -                                                                 | -                        | -               | -                          | -                           | 84±30 (20-138)             | -                  | -                  | -                | -                 | -              | -          |
| Sato et al. (1990) <sup>10*</sup>      | IQ: normal ≥1SD borderline -2SD to -3SD mild -3SD to -2SD moderate -3SD to -4SD          | 67                               | -                                                                 | -                        | -               | 77±12 <sup>†</sup> (58-88) | 81±19 <sup>†</sup> (42-104) | 61±17 <sup>†</sup> (42-72) | -                  | -                  | -                | -                 | -              | -          |
| Tagawa et al. (1988) <sup>11*</sup>    | -                                                                                        | 30                               | Poor mental prognosis was correlated with early onset MMD         | -                        | 101±22 (71-134) | -                          | -                           | -                          | -                  | -                  | -                | -                 | -              | -          |
| Ibayashi et al. (1985) <sup>12*</sup>  | -                                                                                        | -                                | IQ was reduced with advancing age                                 | -                        | 98±19           | 97±16                      | 97±17                       | -                          | -                  | -                  | -                | -                 | -              | -          |
| Ishii et al. (1984) <sup>13*</sup>     | -                                                                                        | 22                               | -                                                                 | -                        | 97±20           | 95±18                      | 97±21                       | 26                         | -                  | -                  | -                | -                 | -              | -          |
| Lei et al. (2017) <sup>41</sup>        | -                                                                                        | -                                | MMD patients performed worse than healthy controls                | -                        | -               | -                          | -                           | -                          | -                  | -                  | -                | -                 | -              | -          |
| Kazumata et al. (2015) <sup>41</sup>   | -                                                                                        | 30                               | MMD impairs executive functioning memory and attention            | -                        | 94±13           | 95±13                      | 93±11                       | 17                         | -                  | -                  | -                | -                 | -              | 33         |

Supplementary Table 4. Continued

| Study                                  | Authors criteria cognitive impairment                                                   | Cognitive impairment overall (%) | Conclusion authors                          | Cognition screener score | % Impaired | (FS) IQ score | % Impaired | VIQ score | % Impaired | PIQ score | % Impaired | DQ score | % Impaired | Memory score        | % Impaired | Procspeed score     | % Impaired      | Att/EF score        | % Impaired       | Visper/const score  | % Impaired | Language score      | % Impaired |
|----------------------------------------|-----------------------------------------------------------------------------------------|----------------------------------|---------------------------------------------|--------------------------|------------|---------------|------------|-----------|------------|-----------|------------|----------|------------|---------------------|------------|---------------------|-----------------|---------------------|------------------|---------------------|------------|---------------------|------------|
| Su et al. (2013) <sup>(8)</sup>        | Abnormal: MoCA <25<br>MCI: MoCA <25±14                                                  | 0                                | No impairment                               | 274±12                   | 0          | -             | -          | -         | -          | -         | -          | -        | -          | -                   | -          | -                   | -               | -                   | -                | -                   | -          | -                   | -          |
| Calviere et al. (2012) <sup>(9)</sup>  | Impairment:<br>z-score ≥1.75D<br>below normative<br>mean<br>EDS:<br>impairment ≥3 tests | 54                               | -                                           | -                        | -          | -             | -          | -         | -          | -         | -          | -        | -          | (z=-0.4)            | 54         | (z=-1.7)            | 23              | (z=-0.95)           | 54               | (z=-0.5)            | 23         | (z=-0.15)           | 31         |
| Festa et al. (2010) <sup>(10)</sup>    | Z-score ≥2 domains >1.5SD<br>or ≥1 domain >2SD below<br>normative mean                  | 69                               | Disruption in a broad<br>range of functions | -                        | -          | 99±17         | -          | -         | -          | -         | -          | -        | -          | z-score<br>-1.1±1.4 | 39         | z-score<br>-0.8±1.1 | 21 <sup>†</sup> | z-score<br>-0.4±0.8 | 19 <sup>**</sup> | z-score<br>-0.4±1.3 | 29         | z-score<br>-0.8±1.1 | 20         |
| Karzmark et al. (2008) <sup>(11)</sup> | >50% of the scores ≥1-2SDs<br>below the mean                                            | 31                               | MMD can affect cognition (mostly EF)        | -                        | -          | 95±9          | 19         | 93±8      | 25         | 93±8      | 25         | -        | 25         | (z=-0.2)            | 7          | (z=-0.9)            | 39              | (z=-0.9)            | 43               | (z=-0.2)            | 23         | (z=-0.6)            | 40         |

Values are presented as mean±standard deviation (range) or mean±standard deviation. This table is divided into overall cognitive results of the studies separated for children and adults, followed by the test results for the cognitive screener test and all the six cognitive domains.

(FS)IQ, (full-scale) intelligent quotient; VIQ, verbal intelligence quotient; PIQ, performat intelligence quotient; DQ, developmental quotient; Procspeed, processing speed; Att, attention; EF, executive function; Visper/const, visual perception/construction; IQ, intelligence quotient; NPA, neuropsychological assessment; SD, standard deviation; MMD, moyamoya disease; MoCA, Montreal Cognitive Assessment; MCI, mild cognitive impairment; EDS, executive dysfunction syndrome.

\*Studies reporting results in children; <sup>†</sup>n=7; <sup>‡</sup>n=9; <sup>§</sup>n=3; <sup>||</sup>Studies reporting results in adults; <sup>†</sup>n=19; <sup>\*\*</sup>n=16.

**Supplementary Table 5.** Longitudinal neuropsychological test performances

| Study                                  | FU period (mo)                      | Surgery type (n)           | Impairment overall (%) | Conclusion authors                                     | % Improved                  | % Stable                    | % Deteriorated             | Cognition screener score, A/B | (FS)IQ                                   |                | VIQ score, A/B                         |                                         | PIQ score, A/B                          |                                       | DQ score, A/B |                | Memory score, A/B                           |                |
|----------------------------------------|-------------------------------------|----------------------------|------------------------|--------------------------------------------------------|-----------------------------|-----------------------------|----------------------------|-------------------------------|------------------------------------------|----------------|----------------------------------------|-----------------------------------------|-----------------------------------------|---------------------------------------|---------------|----------------|---------------------------------------------|----------------|
|                                        |                                     |                            |                        |                                                        |                             |                             |                            |                               | Impaired A/B                             | % Impaired A/B | Impaired A/B                           | % Impaired A/B                          | Impaired A/B                            | % Impaired A/B                        | Impaired A/B  | % Impaired A/B | Impaired A/B                                | % Impaired A/B |
| Lee et al. (2011) <sup>5*</sup>        | 19 <sup>†</sup><br>(5–46)           | ID 65<br>Biffr 42          | -                      | Functions are maintained well before and after surgery | -                           | -                           | -                          | -                             | 107±14/<br>108±13                        | -              | 108±13/<br>106±13                      | 105±16/<br>109±31                       | -                                       | -                                     | -             | -              | (z=0.45)<br>3.8±1.9/<br>(z=0.77)<br>4.5±1.7 | -              |
| Imazumi et al. (1999) <sup>6*</sup>    | >120 <sup>†</sup>                   | C 5<br>ID 13               | -                      | No improvement                                         | -                           | -                           | -                          | -                             | 93±23/-                                  | -              | -                                      | -                                       | -                                       | -                                     | -             | -              | -                                           | -              |
| Ohtaki et al. (1998) <sup>7*</sup>     | 85.2±32.55 <sup>‡</sup><br>(23–110) | C+Biffr 8                  | 13/13                  | Stable                                                 | 12                          | 63                          | 25                         | -                             | 103±20<br>(58–128)/<br>96±25<br>(48–138) | 13/13          | -                                      | -                                       | -                                       | -                                     | -             | -              | -                                           | -              |
| Matsushima et al. (1997) <sup>8*</sup> | 113 <sup>†</sup>                    | ID 20                      | 15/20                  | -                                                      | -                           | -                           | -                          | -                             | 107±18/<br>100±16                        | -              | 105±21/<br>100±16                      | 109±13/<br>100±16                       | -                                       | -                                     | -             | -              | -                                           | -              |
| Matsushima et al. (1991) <sup>9*</sup> | 26.2±14.7 <sup>†</sup><br>(7–58)    | ID 41 <sup>  </sup>        | 50/49                  | Stable                                                 | 27                          | 49                          | 24                         | -                             | -                                        | -              | -                                      | -                                       | 84±30<br>(20–138)/<br>83±32<br>(35–140) | 50/<br>49                             | -             | -              | -                                           | -              |
| Sato et al. (1990) <sup>10*</sup>      | 44.4±26.3 <sup>†</sup><br>(4–99)    | D 1<br>C 1<br>ID 10        | 67/58                  | -                                                      | PIQ 11<br>VIQ 29<br>DQ 0    | PIQ 78<br>VIQ 57<br>DQ 100  | PIQ 11<br>VIQ 14<br>DQ 0   | -                             | -                                        | -              | 77±12<br>(58–88)/<br>82±25<br>(43–112) | 57/29<br>(42–104)/<br>79±24<br>(41–113) | 81±19<br>(42–104)/<br>56/56             | 61±17<br>(42–72)/<br>56±10<br>(45–62) | 100/<br>100   | -              | -                                           | -              |
| Ibayashi et al. (1985) <sup>12*</sup>  | 6.5±4.9 <sup>†</sup><br>(1–17)      | C 2<br>ID 13               | -                      | Surgery is considered to be effective                  | FSIQ 47<br>VIQ 20<br>PIQ 60 | -                           | -                          | -                             | 98±19/<br>99±20                          | -              | 97±16/<br>94±16                        | 97±17/<br>102±18                        | -                                       | -                                     | -             | -              | -                                           | -              |
| Ishii et al. (1984) <sup>13*</sup>     | 6–68 <sup>†</sup>                   | C 2<br>ID 18 <sup>**</sup> | 22/-                   | Improved                                               | FSIQ 53<br>VIQ 13<br>PIQ 67 | FSIQ 40<br>VIQ 73<br>PIQ 20 | FSIQ 6<br>VIQ 13<br>PIQ 13 | -                             | 97±20/-                                  | -              | 95±18/-                                | 97±21/-                                 | -                                       | -                                     | -             | -              | -                                           | -              |
| Su et al. (2013) <sup>16†</sup>        | 24 <sup>‡</sup>                     | -                          | 0/100                  | Deteriorated                                           | 0                           | 0                           | 100                        | 27.4±1.2/<br>18.7±1.3         | 0/100                                    | -              | -                                      | -                                       | -                                       | -                                     | -             | -              | -                                           | -              |

Values are presented as median (range), mean±standard deviation, mean±standard deviation (range), mean±standard deviation, or range. This table is divided into overall cognitive results at follow-up of the studies separated for children and adults, followed by the test results for the cognitive screener test and the available cognitive domains.  
 FU, follow-up; A, prior neuropsychological test result; B, longitudinal neuropsychological test result; (FS)IQ, (full-scale) intelligent quotient; VIQ, verbal intelligence quotient; PIQ, performal intelligence quotient; DQ, developmental quotient; ID, indirect; Biffr, bifrontal; C, combined; D, direct.  
 \*Studies reporting results in children; <sup>†</sup>FU period defined as time of operation to NPA; <sup>‡</sup>FU period defined as time of disease to NPA; <sup>||</sup>41 out of the 50 patients investigated postoperatively; <sup>§</sup>FU period unspecified; <sup>\*\*</sup>15 out of the 20 patients investigated postoperatively; <sup>††</sup>Studies reporting results in adults.

**Supplementary Table 6.** Critical appraisal of the included studies

| Study                                  | Study design    | Selection                        |             |                    |                           | Outcome            |                   |
|----------------------------------------|-----------------|----------------------------------|-------------|--------------------|---------------------------|--------------------|-------------------|
|                                        |                 | Representativeness of the sample | Sample size | Selection criteria | Ascertainment of exposure | Assessment outcome | Quantitative data |
| Hsu et al. (2014) <sup>3*</sup>        | Cross-sectional | +                                |             | +                  | +                         | ++                 | +                 |
| Williams et al. (2012) <sup>4*</sup>   | Cross-sectional | +                                | +           | +                  | +                         | ++                 | +                 |
| Lee et al. (2011) <sup>5*</sup>        | Cross-sectional | +                                | +           | +                  | +                         | ++                 | +                 |
| Imaizumi et al. (1999) <sup>6*</sup>   | Cross-sectional | +                                | +           | +                  |                           | +                  | +                 |
| Ohtaki et al. (1998) <sup>7*</sup>     | Cross-sectional | +                                |             | +                  | +                         | +                  | +                 |
| Matsushima et al. (1997) <sup>8*</sup> | Cross-sectional | +                                |             | +                  | +                         | +                  | +                 |
| Matsushima et al. (1991) <sup>9*</sup> | Cross-sectional | +                                | +           | +                  |                           | +                  | +                 |
| Sato et al. (1990) <sup>10*</sup>      | Cross-sectional | +                                |             | +                  | +                         | +                  | +                 |
| Tagawa et al. (1989) <sup>11*</sup>    | Cross-sectional | +                                |             | ? <sup>†</sup>     | ? <sup>†</sup>            | +                  | +                 |
| Ibayashi et al. (1985) <sup>12*</sup>  | Cross-sectional | +                                |             | ? <sup>†</sup>     | ? <sup>†</sup>            | +                  | +                 |
| Ishii et al. (1984) <sup>13*</sup>     | Cross-sectional | +                                |             |                    |                           | +                  | +                 |
| Lei et al. (2017) <sup>14†</sup>       | Cross-sectional | +                                | +           | +                  | +                         | +                  | +                 |
| Kazumata et al. (2015) <sup>15†</sup>  | Cross-sectional | +                                |             | +                  | +                         | ++                 | +                 |
| Su et al. (2013) <sup>16†</sup>        | Cross-sectional | +                                |             | +                  | +                         | +                  | +                 |
| Calviere et al. (2012) <sup>17†</sup>  | Cross-sectional | +                                |             | +                  | +                         | ++                 | +                 |
| Festa et al. (2010) <sup>18†</sup>     | Cross-sectional | +                                |             | +                  | +                         | ++                 | +                 |
| Karzmark et al. (2008) <sup>19†</sup>  | Cross-sectional | +                                | +           |                    | +                         | ++                 | +                 |

\*Studies reporting results in children; <sup>†</sup>This information could not be extracted by our translators; <sup>‡</sup>Studies reporting results in adults.

**Supplementary Table 7.** Linear regression analysis

| Authors                                | Cognitive impairment overall (%) | Mean age                           | Duration symptoms (mo)            | % Female                           | % Infarction                       | % TIA(s)                           |
|----------------------------------------|----------------------------------|------------------------------------|-----------------------------------|------------------------------------|------------------------------------|------------------------------------|
| B (95 CI; P)                           |                                  | -0.014<br>(-0.112 to 0.083; 0.723) | 0.000<br>(-0.016 to 0.016; 0.945) | -0.005<br>(-0.025 to 0.014; 0.508) | -0.002<br>(-0.017 to 0.013; 0.672) | -0.002<br>(-0.013 to 0.017; 0.672) |
| Hsu et al. (2014) <sup>3*</sup>        | 39                               | 13.9±6.3<br>(6-17)                 | 17±15.9<br>(1-48)                 | -                                  | 0                                  | 100                                |
| Ohtaki et al. (1998) <sup>7*</sup>     | 13                               | 7.1±2.0<br>(5-11)                  | 18.9±19.7<br>(2-60)               | 75                                 | -                                  | -                                  |
| Matsushima et al. (1997) <sup>8*</sup> | 15                               | 9.6±3.4                            | -                                 | 40                                 | 30                                 | 70                                 |
| Matsushima et al. (1991) <sup>9*</sup> | 50                               | 9.4±4.3<br>(1.6-21)                | 55.8±50.7<br>(0-188.4)            | 56                                 | -                                  | -                                  |
| Sato et al. (1990) <sup>10*</sup>      | 67                               | 5.9±2.3<br>(1-10)                  | 12.6±10.6<br>(1-31)               | 33                                 | 31                                 | 69                                 |
| Tagawa et al. (1989) <sup>11*</sup>    | 30                               | 10.2±3.2<br>(6-16)                 | 57.8±50.5<br>(13-155)             | 60                                 | 10                                 | 90                                 |
| Ishii et al. (1984) <sup>13*</sup>     | 22                               | 9.9±3.1<br>(5-16)                  | -                                 | 50                                 | 60                                 | 40                                 |
| B (95 CI; P)                           |                                  | -0.044<br>(-0.184 to 0.096; 0.387) | -                                 | 0.011<br>(-0.031 to 0.053; 0.460)  | -                                  | -                                  |
| Kazumata et al. (2015) <sup>15†</sup>  | 30                               | 40.9±9.5<br>(21-58)                | -                                 | 74                                 | -                                  | -                                  |
| Su et al. (2013) <sup>16†</sup>        | 0                                | 43.7±8.6<br>(26-59)                | -                                 | 46                                 | -                                  | -                                  |
| Calviere et al. (2012) <sup>17†</sup>  | 54                               | 36.6±12.9                          | -                                 | 64                                 | -                                  | -                                  |
| Festa et al. (2010) <sup>18†</sup>     | 69                               | 39.9±11.2<br>(20-65)               | -                                 | 62                                 | -                                  | -                                  |
| Karzmark et al. (2008) <sup>19†</sup>  | 31                               | 36.6±9.9                           | -                                 | 67                                 | -                                  | -                                  |

Values are presented as mean±standard deviation (range) or mean±standard deviation. This table represents the results of the linear regression analysis weighted by the inverse standard error of the proportion of patients with impaired cognition for the available patients' characteristics.

TIA, transient ischemic attack; CI, confidence interval.

\*Studies reporting results in children; †Studies reporting results in adults.

## Supplementary references

1. Wells GA, Shea B, O'Connell D, Peterson J, Welch V, Losos M, et al. The Newcastle-Ottawa Scale (NOS) for assessing the quality of nonrandomised studies in meta-analyses. Ottawa Hospital Research Institute. [http://www.ohri.ca/programs/clinical\\_epidemiology/oxford.asp](http://www.ohri.ca/programs/clinical_epidemiology/oxford.asp). Accessed September 3, 2018.
2. Herzog R, Álvarez-Pasquin MJ, Díaz C, Del Barrio JL, Estrada JM, Gil Á. Are healthcare workers' intentions to vaccinate related to their knowledge, beliefs and attitudes? A systematic review. *BMC Public Health* 2013;13:154.
3. Hsu YH, Kuo MF, Hua MS, Yang CC. Selective neuropsychological impairments and related clinical factors in children with moyamoya disease of the transient ischemic attack type. *Childs Nerv Syst* 2014;30:441-447.
4. Williams TS, Westmacott R, Dlamini N, Granite L, Dirks P, Askalan R, et al. Intellectual ability and executive function in pediatric moyamoya vasculopathy. *Dev Med Child Neurol* 2012;54:30-37.
5. Lee JY, Phi JH, Wang KC, Cho BK, Shin MS, Kim SK. Neurocognitive profiles of children with moyamoya disease before and after surgical intervention. *Cerebrovasc Dis* 2011;31:230-237.
6. Imaizumi C, Imaizumi T, Osawa M, Fukuyama Y, Takeshita M. Serial intelligence test scores in pediatric moyamoya disease. *Neuropediatrics* 1999;30:294-299.
7. Ohtaki M, Uede T, Morimoto S, Nonaka T, Tanabe S, Hashi K. Intellectual functions and regional cerebral haemodynamics after extensive omental transplantation spread over both frontal lobes in childhood moyamoya disease. *Acta Neurochir (Wien)* 1998;140:1043-1053.
8. Matsushima Y, Aoyagi M, Nariai T, Takada Y, Hirakawa K. Long-term intelligence outcome of post-encephalo-duro-arterio-synangiosis childhood moyamoya patients. *Clin Neurol Neurosurg* 1997;99 Suppl 2:S147-S150.
9. Matsushima Y, Aoyagi M, Koumo Y, Takasato Y, Yamaguchi T, Masaoka H, et al. Effects of encephalo-duro-arterio-synangiosis on childhood moyamoya patients: swift disappearance of ischemic attacks and maintenance of mental capacity. *Neurol Med Chir (Tokyo)* 1991;31:708-714.
10. Sato H, Sato N, Tamaki N, Matsumoto S. Chronic low-perfusion state in children with moyamoya disease following revascularization. *Childs Nerv Syst* 1990;6:166-171.
11. Tagawa T, Itagaki Y, Mimaki T, Tanaka J, Ito N, Suzuki Y, et al. Intelligence and regional cerebral blood flow in children with Moyamoya disease. *No To Hattatsu* 1989;21:9-13.
12. Ibayashi K, Takeuchi S, Ishii R, Tanaka R, Tsuruoka H. Intelligence and memory function of juvenile patients with moyamoya disease. With reference to the effect of surgical treatment. *Nerv Syst Child* 1985;10:155-161.
13. Ishii R, Takeuchi S, Ibayashi K, Tanaka R. Intelligence in children with moyamoya disease: evaluation after surgical treatments with special reference to changes in cerebral blood flow. *Stroke* 1984;15:873-877.
14. Lei Y, Su J, Jiang H, Guo Q, Ni W, Yang H, et al. Aberrant regional homogeneity of resting-state executive control, default mode, and salience networks in adult patients with moyamoya disease. *Brain Imaging Behav* 2017;11:176-184.
15. Kazumata K, Tha KK, Narita H, Kusumi I, Shichinohe H, Ito M, et al. Chronic ischemia alters brain microstructural integrity and cognitive performance in adult moyamoya disease. *Stroke* 2015;46:354-360.
16. Su SH, Hai J, Zhang L, Yu F, Wu YF. Assessment of cognitive function in adult patients with hemorrhagic moyamoya disease who received no surgical revascularization. *Eur J Neurol* 2013;20:1081-1087.
17. Calviere L, Ssi Yan Kai G, Catalaa I, Marlats F, Bonneville F, Larue V. Executive dysfunction in adults with moyamoya disease is associated with increased diffusion in frontal white matter. *J Neurol Neurosurg Psychiatry* 2012;83:591-593.
18. Festa JR, Schwarz LR, Pliskin N, Cullum CM, Lacritz L, Charbel FT, et al. Neurocognitive dysfunction in adult moyamoya disease. *J Neurol* 2010;257:806-815.
19. Karzmark P, Zeifert PD, Tan S, Dorfman LJ, Bell-Stephens TE, Steinberg GK. Effect of moyamoya disease on neuropsychological functioning in adults. *Neurosurgery* 2008;62:1048-1051.
20. Lezak M, Howieson D, Bigler E, Tranel D. *Neuropsychological Assessment*. 5th ed. New York, NY: Oxford University Press, 2012.
